# Supplementary material for: Carbon-wrapped Fe–Ni bimetallic nanoparticle-catalyzed Friedel–Crafts acylation for green synthesis of aromatic ketones
Source: Royal Society of Chemistry journal article supplement (doi:10.1039/d1cy01304a), 2021-01-01
Supplement: d1cy01304a1.pdf [file d1cy01304a1.pdf]

Supporting Information for

**Carbon wrapped Fe-Ni bimetallic nanoparticles catalyzed Friedel-Crafts acylation toward green synthesis of aromatic ketones**

Hao Zhang ‡<sup>a</sup>, Xiaojing Song ‡<sup>b</sup>, Hao Sun <sup>c</sup>, Zhenyu Lei <sup>a</sup>, Shouxin Bao <sup>d</sup>, Chen Zhao <sup>a</sup>,  
Dianwen Hu <sup>a</sup>, Wenxiang Zhang <sup>a</sup>, Jingyao Liu <sup>c, \*</sup>, Mingjun Jia <sup>a, \*</sup>

<sup>a</sup> *Institute of Physical Chemistry, College of Chemistry, Jilin University, Changchun 130012, Jilin, China*

<sup>b</sup> *State Key Laboratory of Catalysis, iChEM, Dalian Institute of Chemical Physics, Chinese Academy of Sciences, Dalian 116023, Liaoning, China*

<sup>c</sup> *Laboratory of Theoretical and Computational Chemistry, Institute of Theoretical Chemistry, Jilin University, Changchun 130012, Jilin, China*

<sup>d</sup> *State Key Laboratory of Inorganic Synthesis and Preparative Chemistry, College of Chemistry, Jilin University, Changchun 130012, Jilin, China*

\*Corresponding authors. Tel: +86-431-85155390; Fax: +86-431-85155420;

Emails: l jy121@jlu.edu.cn; jiamj@jlu.edu.cn

‡The two authors contributed equally to this work.

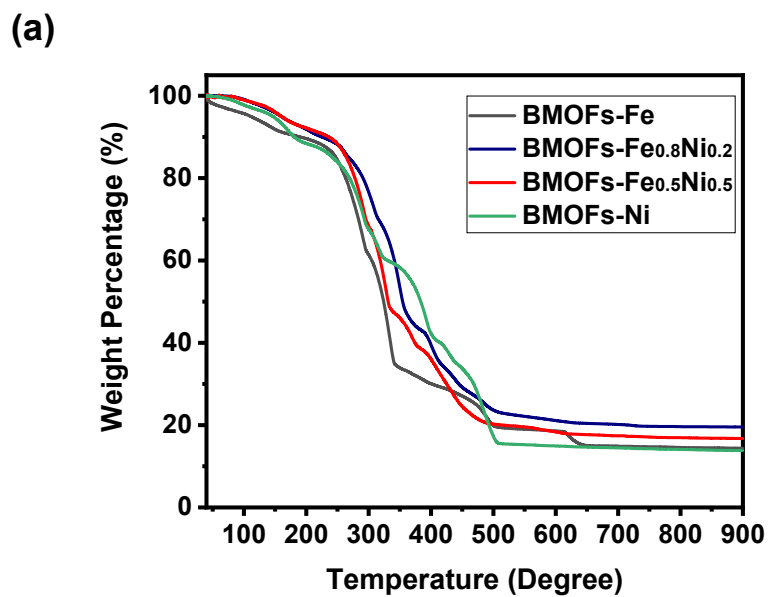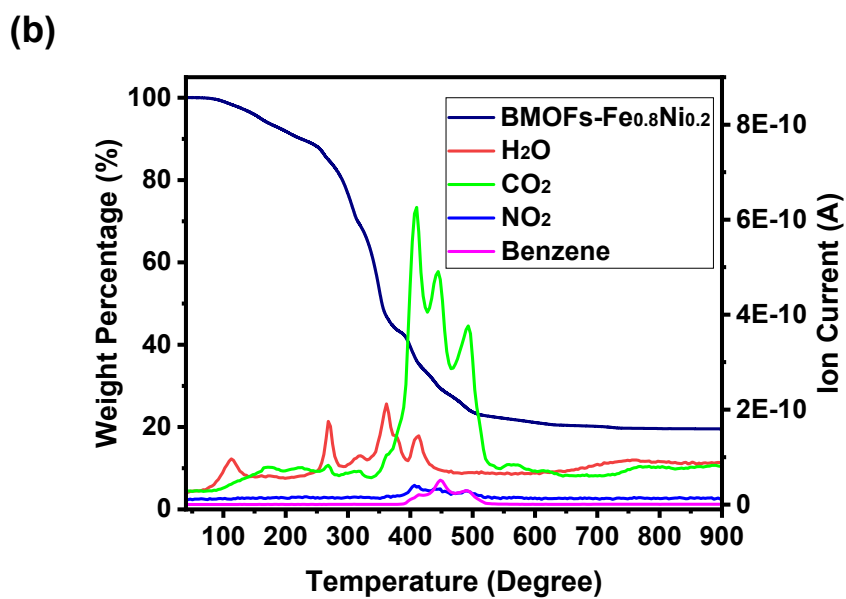

**Figure S1.** The TG profiles of the BMOFs-Fe<sub>x</sub>Ni<sub>1-x</sub> (a) and the TG-MS profiles of the BMOFs-Fe<sub>0.8</sub>Ni<sub>0.2</sub> (b) under an inert atmosphere.

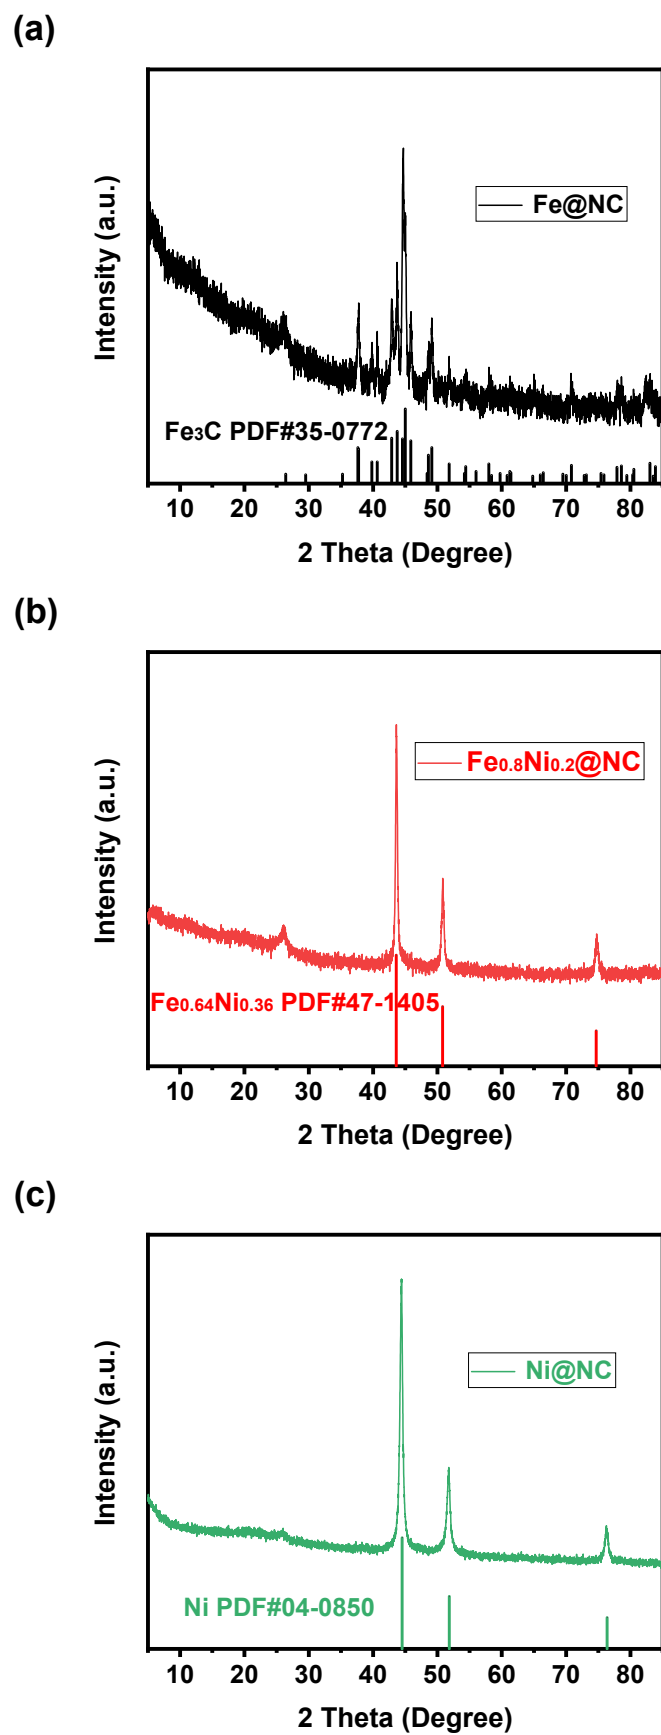

**Figure S2.** XRD patterns of (a) Fe@NC, (b) Fe<sub>0.8</sub>Ni<sub>0.2</sub>@NC, (c) Ni@NC, respectively.

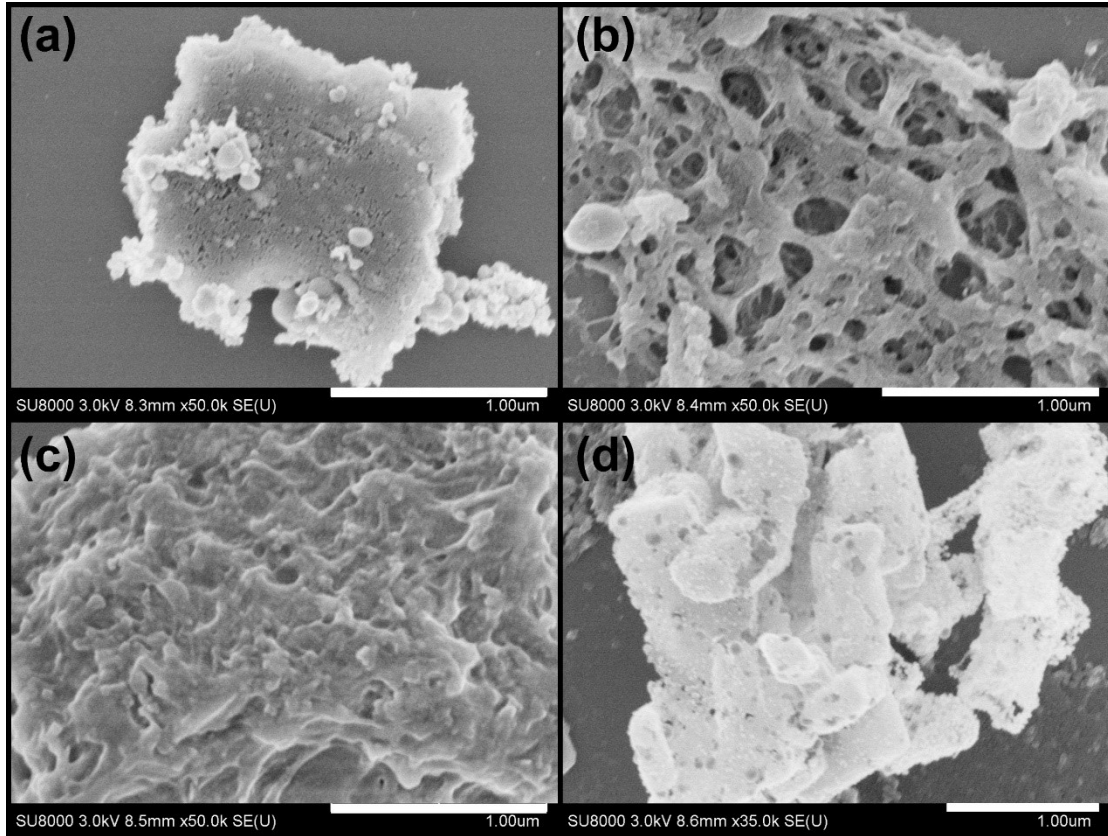

**Figure S3.** SEM images of (a) Fe@NC, (b) Fe<sub>0.8</sub>Ni<sub>0.2</sub>@NC, (c) Fe<sub>0.5</sub>Ni<sub>0.5</sub> and (d) Ni@NC. The bar in SEM images represents the 1 um scale.

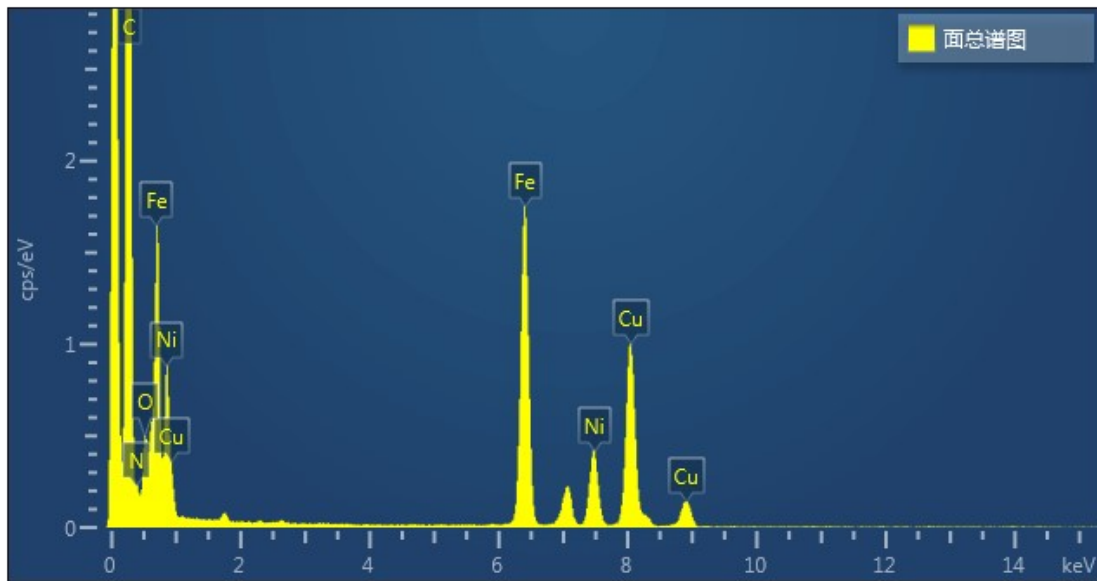

**Figure S4.** EDS spectra of Fe<sub>0.8</sub>Ni<sub>0.2</sub>@NC.

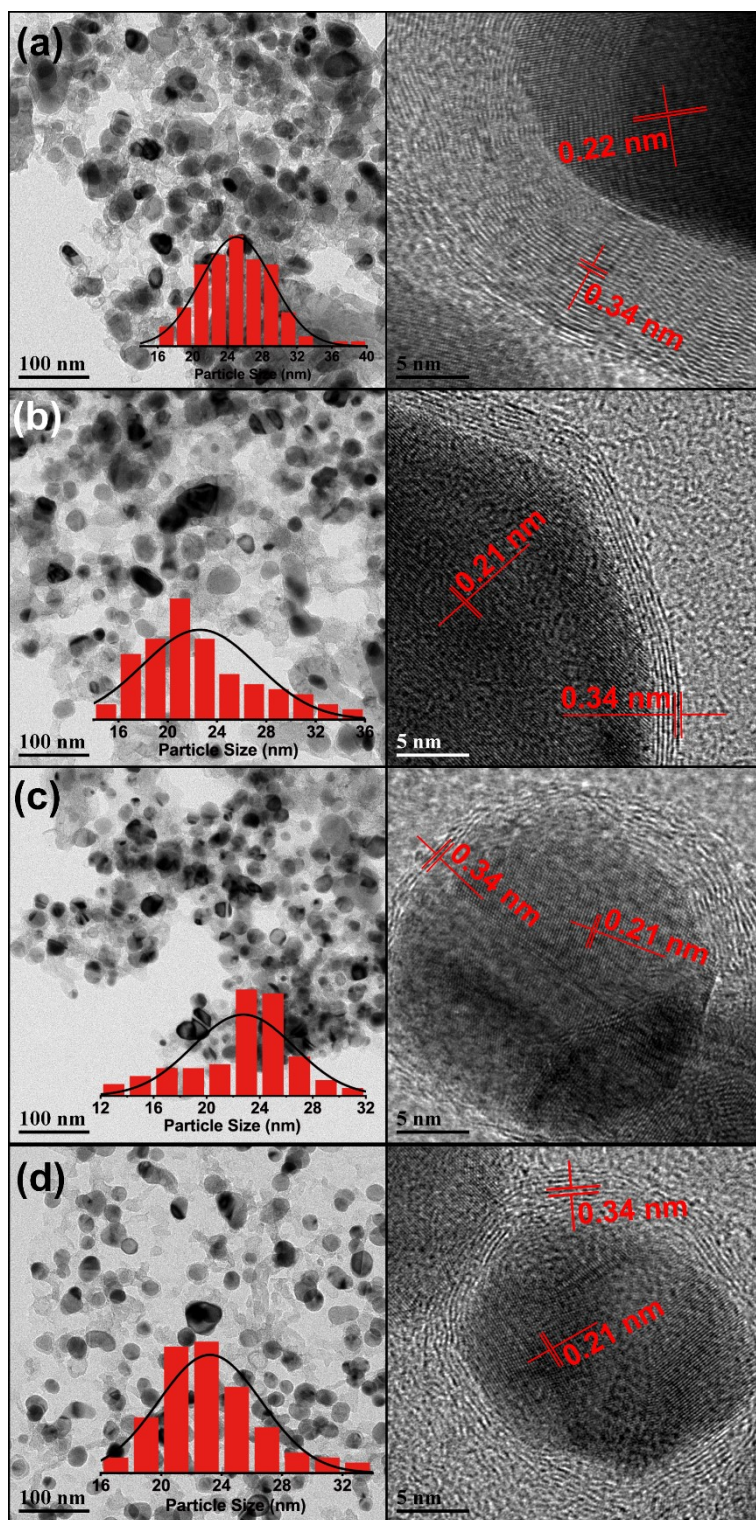

**Figure S5.** TEM and HRTEM images of (a) Fe@NC, (b) Fe<sub>0.9</sub>Ni<sub>0.1</sub>@NC, (c) Fe<sub>0.5</sub>Ni<sub>0.5</sub>@NC and (d) Ni@NC. The inset in TEM is the statistical analysis on the particle size.

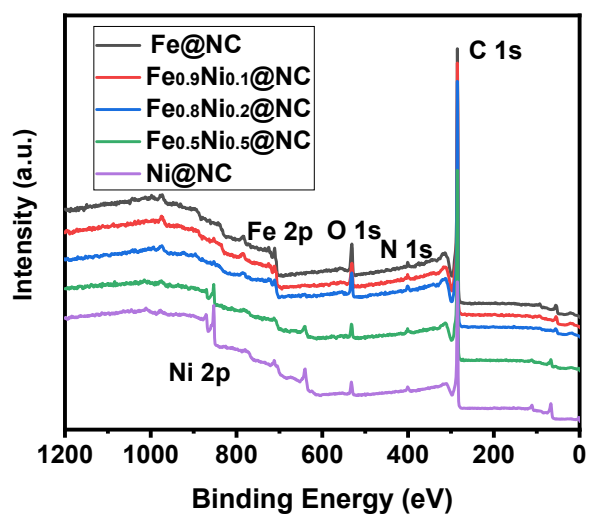

**Figure S6.** XPS survey spectra of Fe<sub>x</sub>Ni<sub>1-x</sub>@NC catalysts.

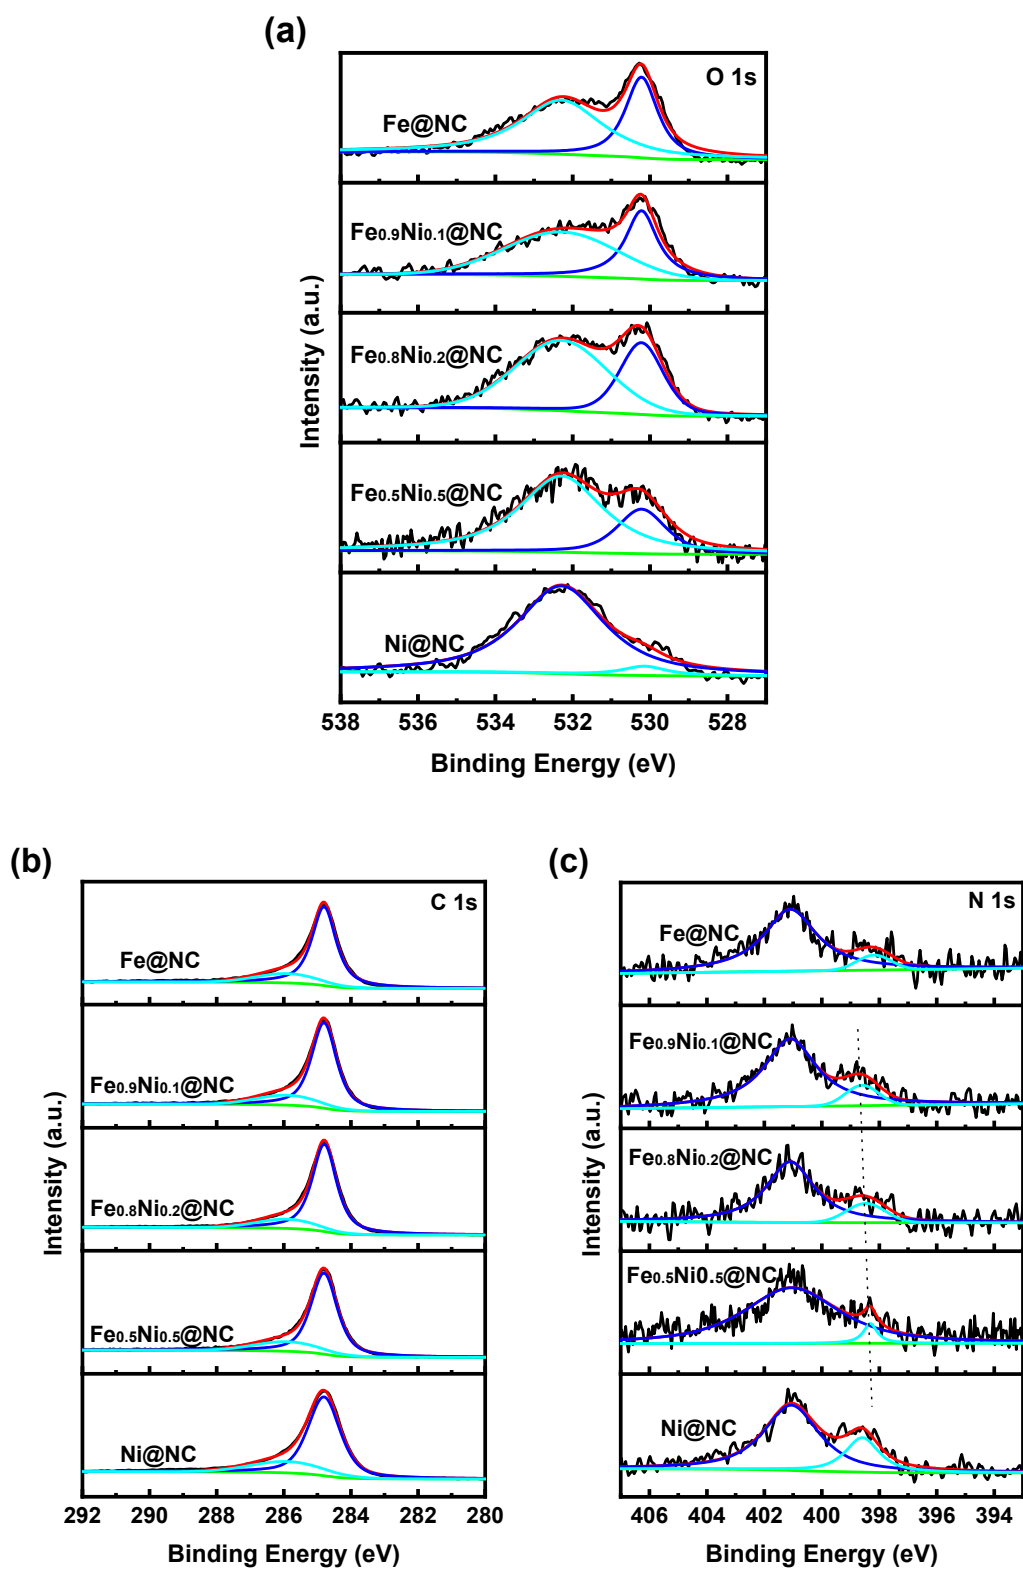

**Figure S7.** XPS profiles for the binding energies of (a) O 1s, (b) C 1s and (c) N 1s for

$\text{Fe}_x\text{Ni}_{1-x}\text{@NC}$  catalysts.

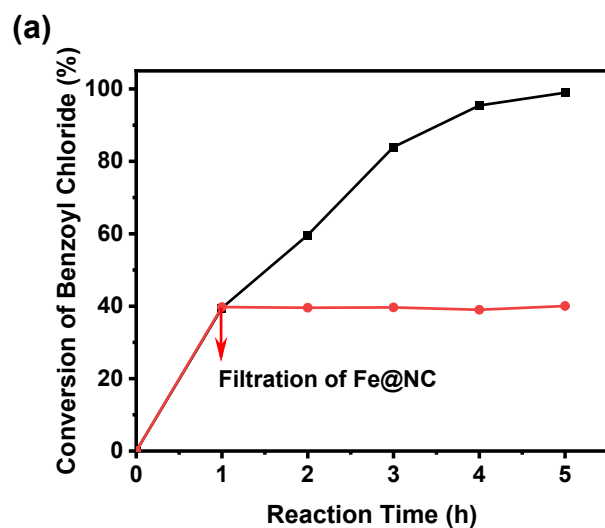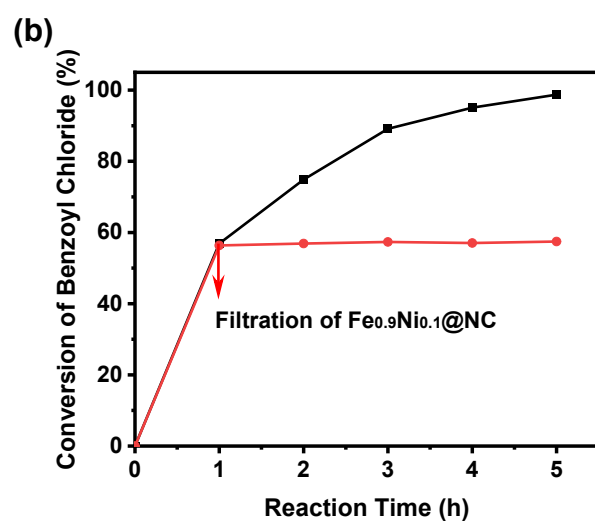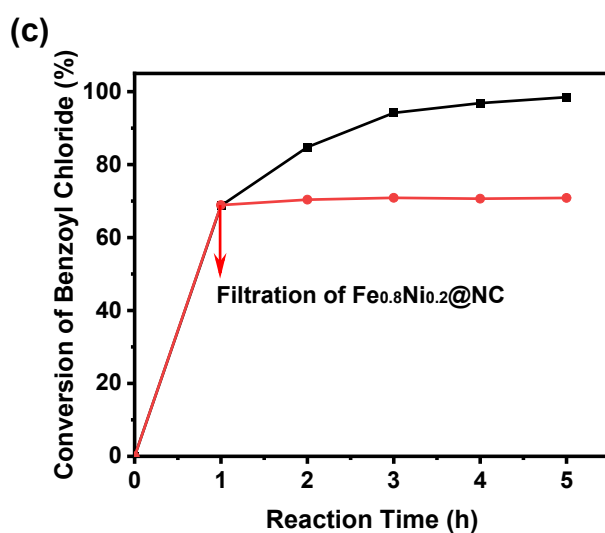

**Figure S8.** Time-course and leaching tests of Fe<sub>x</sub>Ni<sub>1-x</sub>@NC catalysts. Reaction conditions: 130 °C reaction temperature, 20 mmol m-xylene, 10 mmol benzoyl chloride, 10 mmol dodecane, 50 mg catalyst.



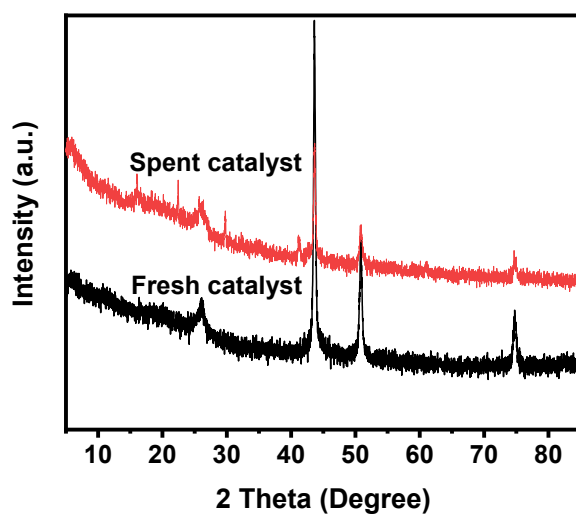

**Figure S9.** XRD diffraction patterns of fresh and used  $\text{Fe}_{0.8}\text{Ni}_{0.2}@NC$  catalysts after several consecutive cycles.

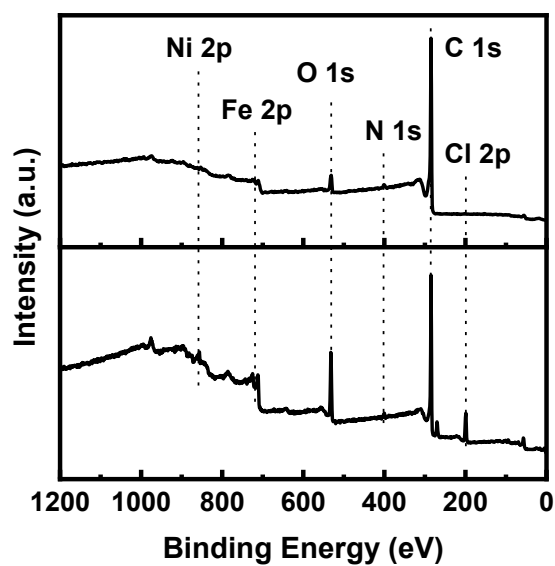

**Figure S10.** XPS survey spectra of the fresh (upper) and spent (down)  $\text{Fe}_{0.8}\text{Ni}_{0.2}@NC$  catalysts.

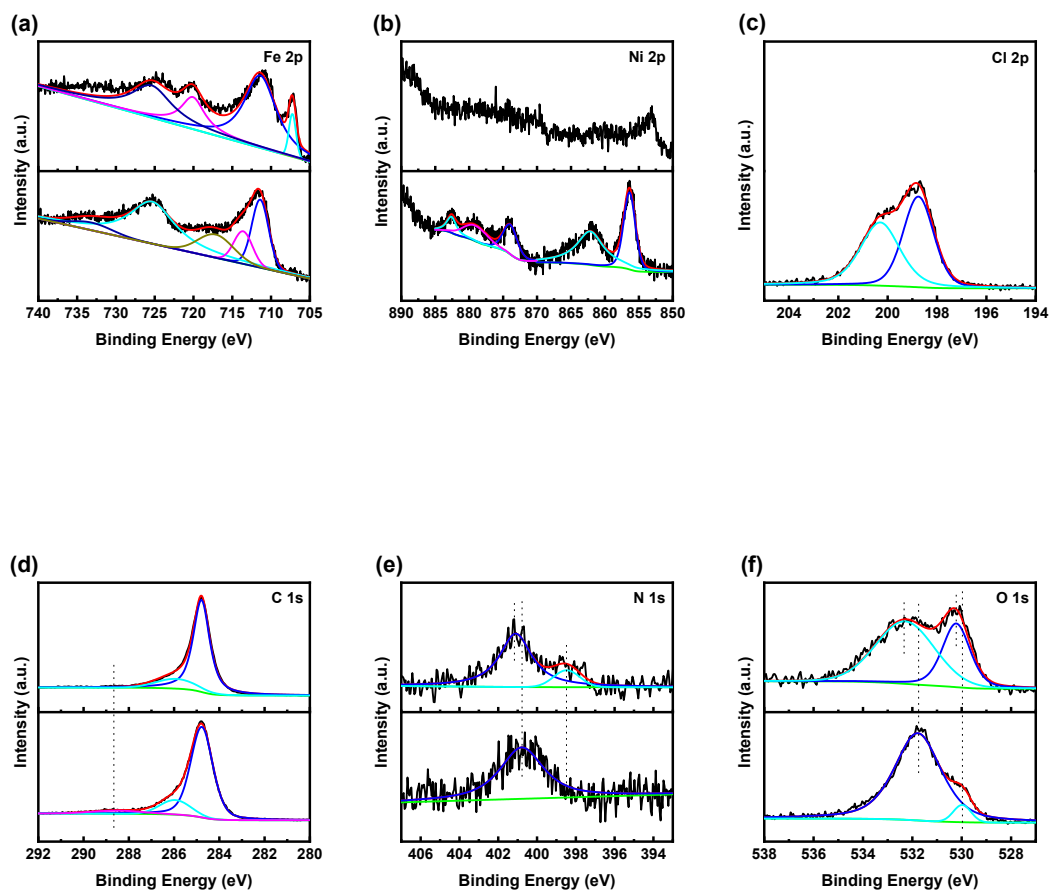

**Figure S11.** XPS survey spectra of Fe 2p (a), Ni 2p (b), Cl 2p (c), C 1s (d), N 1s (e) and O 1s (f) of the fresh (upper) and the spent (down) catalyst of  $\text{Fe}_{0.8}\text{Ni}_{0.2}@NC$ .

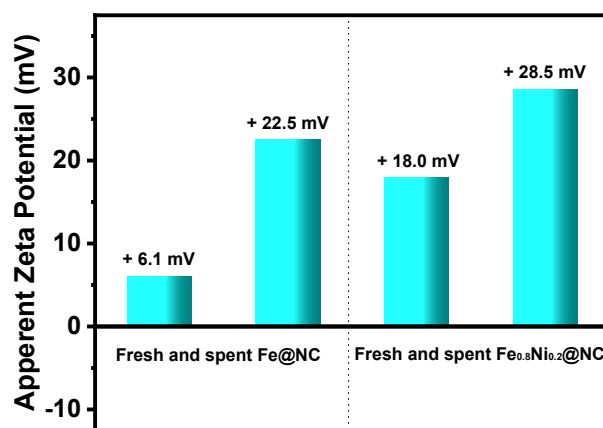

**Figure S12.** Zeta-potential of fresh and spent Fe@NC and Fe<sub>0.8</sub>Ni<sub>0.2</sub>@NC catalysts.

**Table S1.** The elemental contents on the surface of  $\text{Fe}_x\text{Ni}_{1-x}\text{@NC}$  obtained from XPS analysis.

| Samples                                      | Elemental composition (At. %) |      |       |      |      |      |
|----------------------------------------------|-------------------------------|------|-------|------|------|------|
|                                              | C                             | N    | O     | Fe   | Ni   | Cl   |
| Fe@NC                                        | 89.73                         | 1.50 | 6.98  | 1.79 | -    | -    |
| $\text{Fe}_{0.9}\text{Ni}_{0.1}\text{@NC}$   | 90.80                         | 1.92 | 5.52  | 1.63 | 0.13 | -    |
| $\text{Fe}_{0.8}\text{Ni}_{0.2}\text{@NC}$   | 90.64                         | 1.73 | 6.01  | 1.27 | 0.35 | -    |
| $\text{Fe}_{0.5}\text{Ni}_{0.5}\text{@NC}$   | 91.34                         | 1.83 | 4.48  | 0.93 | 1.42 | -    |
| Ni@NC                                        | 87.41                         | 2.65 | 5.50  | -    | 4.44 | -    |
| $\text{Fe}_{0.8}\text{Ni}_{0.2}\text{@NC}^*$ | 68.59                         | 1.85 | 16.59 | 5.20 | 1.56 | 6.21 |

\*The recycled catalyst of  $\text{Fe}_{0.8}\text{Ni}_{0.2}\text{@NC}$  after Friedel-Crafts acylation reactions.

**Table S2.** Influence of various substrates or acylation reagents on Fe@NC and Fe<sub>0.8</sub>Ni<sub>0.2</sub>@NC catalyzed Friedel-Crafts acylation reaction<sup>a</sup>.

| Entry | Substrate                                                                           | Acylation reagent                                                                   | Time/h | Fe@NC                |                       | Fe <sub>0.8</sub> Ni <sub>0.2</sub> @NC |                       |
|-------|-------------------------------------------------------------------------------------|-------------------------------------------------------------------------------------|--------|----------------------|-----------------------|-----------------------------------------|-----------------------|
|       |                                                                                     |                                                                                     |        | Con. <sup>b</sup> /% | Yield <sup>c</sup> /% | Con. <sup>b</sup> /%                    | Yield <sup>c</sup> /% |
| 1     |    |    | 1      | 4                    | 4                     | 15                                      | 12                    |
|       |                                                                                     |                                                                                     | 5      | 62                   | 49                    | 71                                      | 56                    |
| 2     |    |    | 1      | 36                   | 29                    | 51                                      | 40                    |
|       |                                                                                     |                                                                                     | 5      | 83                   | 63                    | 83                                      | 64                    |
| 3     |    |    | 1      | 40                   | 38                    | 69                                      | 66                    |
|       |                                                                                     |                                                                                     | 5      | 99                   | 95                    | 99                                      | 95                    |
| 4     |    |    | 1      | 29                   | 29                    | 48                                      | 48                    |
|       |                                                                                     |                                                                                     | 5      | 73                   | 73                    | 87                                      | 87                    |
| 5     |    |    | 1      | 70                   | 70                    | 94                                      | 94                    |
| 6     |   |   | 1      | 56                   | 51                    | 70                                      | 66                    |
|       |                                                                                     |                                                                                     | 3      | 59                   | 53                    | 80                                      | 76                    |
| 7     |  |  | 5      | 0                    | 0                     | 0                                       | 0                     |
| 8     |  |  | 5      | 0                    | 0                     | 0                                       | 0                     |
| 9     |  |  | 5      | 0                    | 0                     | 0                                       | 0                     |
| 10    |  |  | 1      | 41                   | 40                    | 43                                      | 41                    |
|       |                                                                                     |                                                                                     | 5      | 84                   | 81                    | 93                                      | 89                    |
| 11    |  |  | 1      | 15                   | 14                    | 37                                      | 36                    |
|       |                                                                                     |                                                                                     | 5      | 71                   | 68                    | 88                                      | 86                    |
| 12    |  |  | 1      | 18                   | 13                    | 28                                      | 21                    |
|       |                                                                                     |                                                                                     | 5      | 26                   | 19                    | 58                                      | 41                    |

<sup>a</sup> Reaction conditions: temperature = 130 °C, catalyst dose = 0.05 g, n (substrate)/n (acylation reagent) =

2:1. <sup>b</sup> Conversion of the acylation reagent. <sup>c</sup> Yield of the main product.
